# Supplementary material
Source: publisher figshare collection journal article supplement (https://gsapubs.figshare.com/ndownloader/files/22408128)
Supplement: Supplementary file 1 [file 22408128]

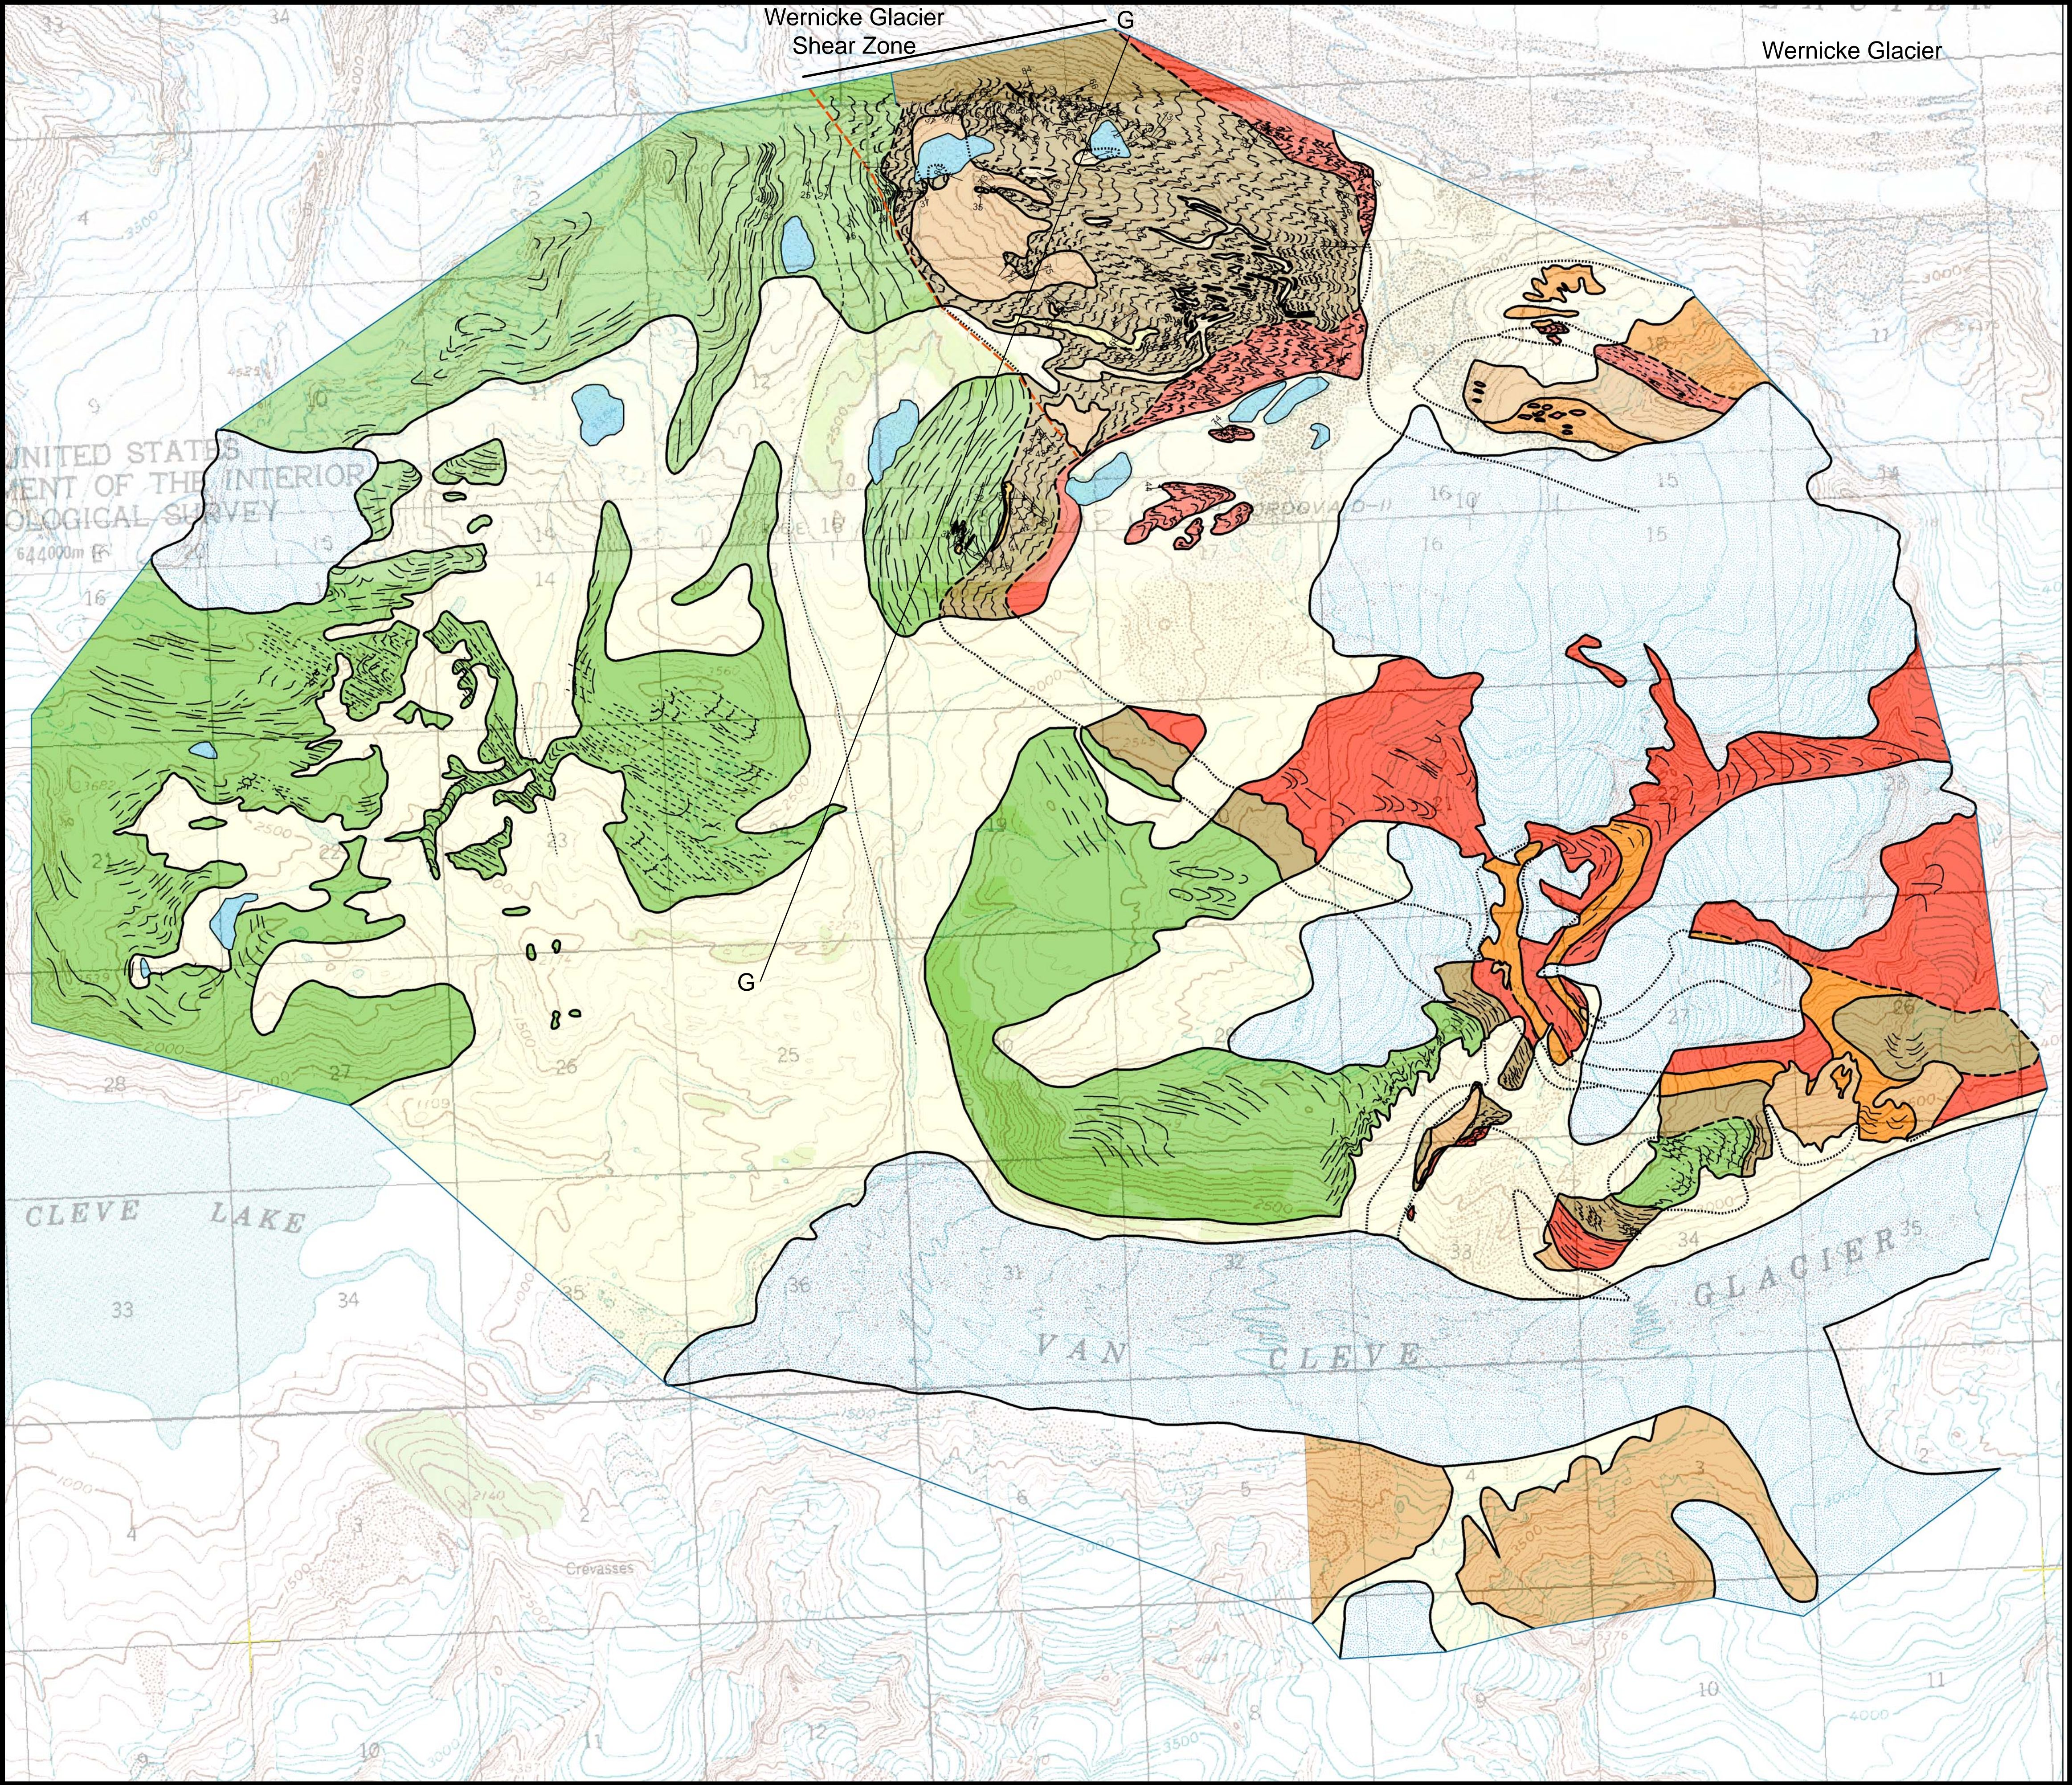

# Geological Map of the Wernicke Glacier Transect

Map compiled from  
Pavlis and Sisson (2003)  
and new mapping by  
Scharman and Pavlis in 2008

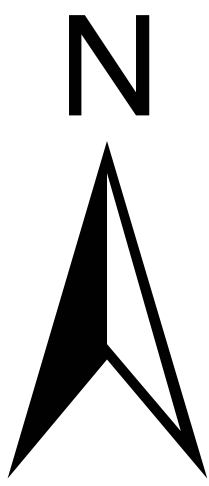

1 Kilometers  
1:24,000

## Explanation

### Orientations

- S0/S1
- S2
- S3
- Sgw
- Igneous dike

### Deformation Fabric Surface Traces

- S2
- S3

### Contact Quality

- Covered
- Exposed
- Projected

### Shear Zones and Faults

- Dextral Shear Zone Boundary
- Covered Normal Fault
- Projected Normal Fault

### Lithology

- Lake
- Glacier
- Quaternary Cover
- Ti2: Tertiary Intrusive Tonalite
- Ti3: Tertiary Intrusive Tonalite
- Ti4: Tertiary Intrusive Tonalite
- Orthogneiss
- Amphibolite Facies Schist
- Amphibolite Facies Transition Gneiss
- Amphibolite Facies Gneiss

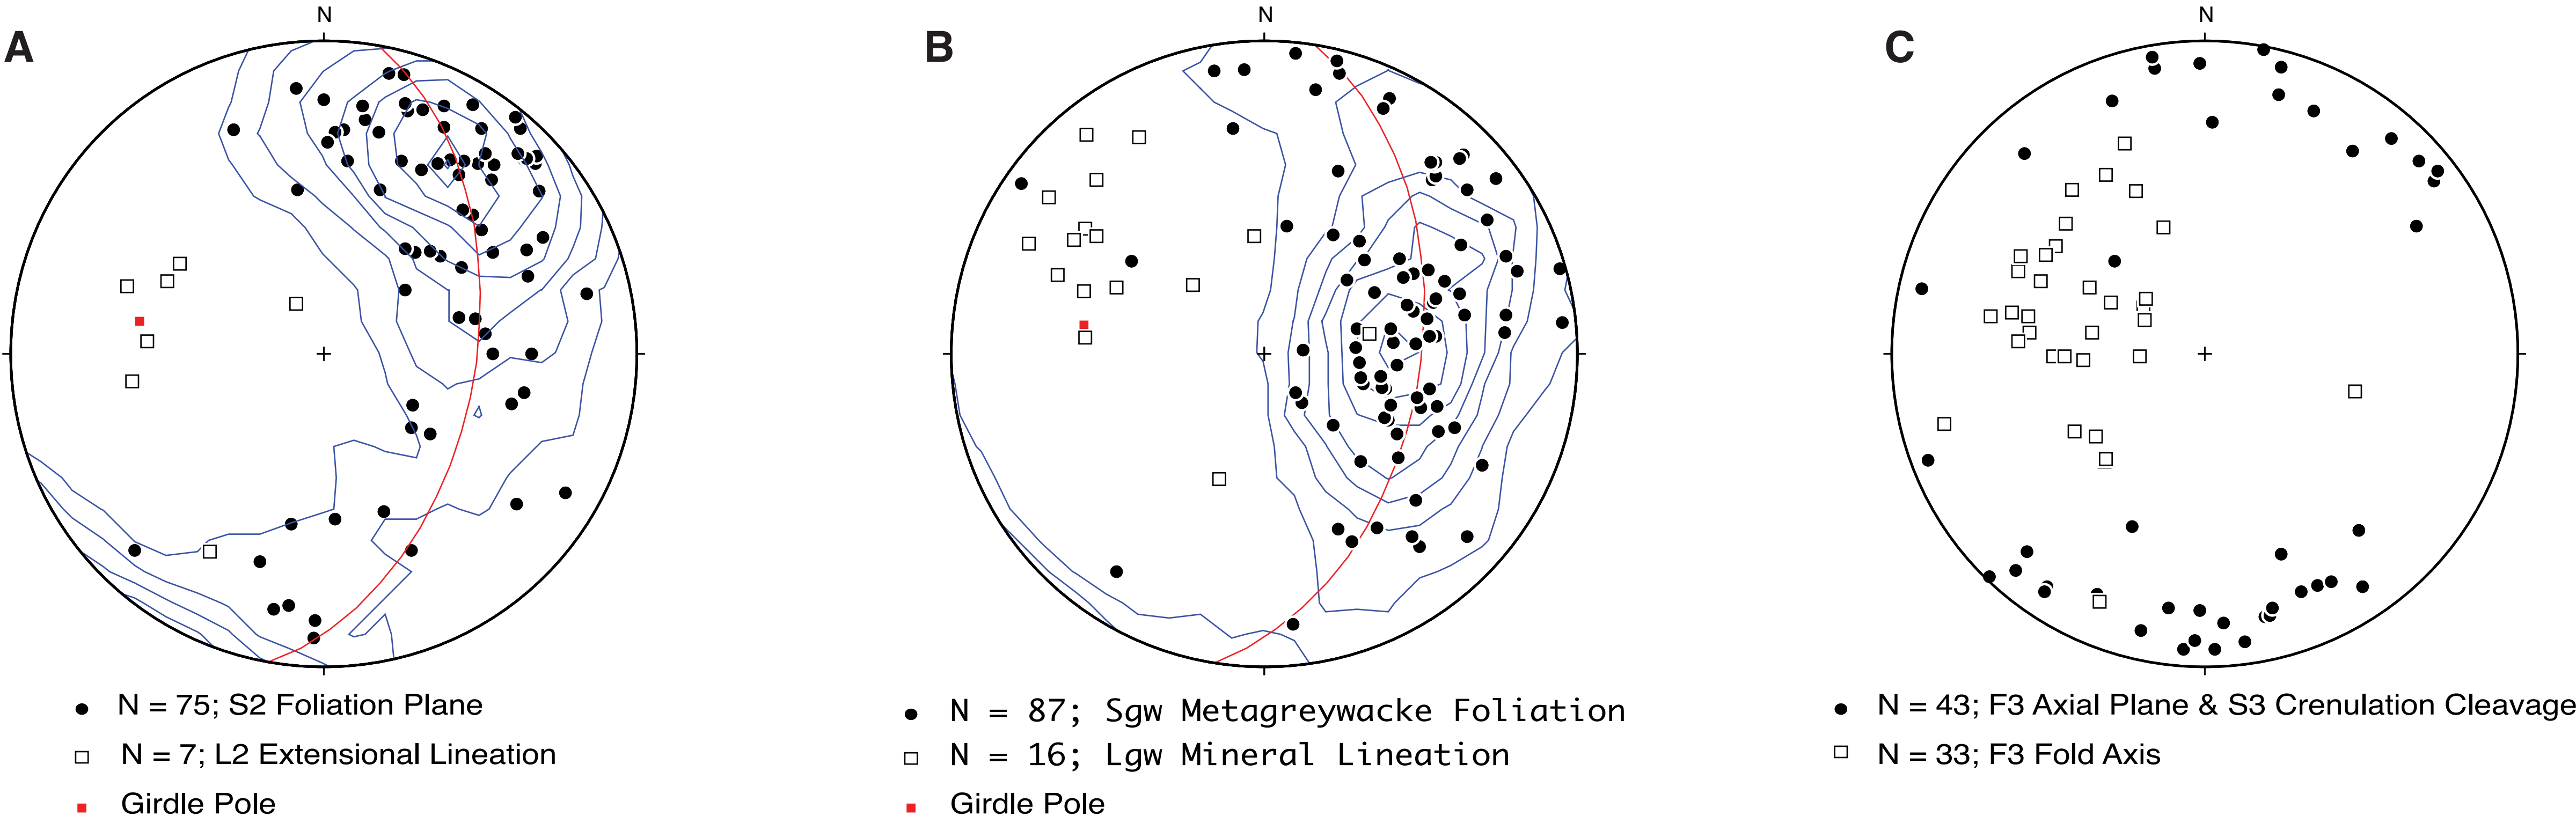

Equal-area stereographic projection plots summarizing orientation data from the Wernicke Glacier transect. A. Kamb contour plot of S2 foliations, with Lext lineations. B. Kamb contour plot of Sgw foliations, with Lgw lineations. C. F3 axial planes and S3 crenulation cleavage with F3 fold axes.
